# Supplementary material for: Shifts in the Skin-Associated Microbiota of Hatchery-Reared Common Snook Centropomus undecimalis During Acclimation to the Wild
Source: PubMed Central journal article supplement (PMC6469608; doi:10.1007/s00248-018-1252-7), 2018-09-06
Supplement: 248_2018_1252_MOESM1_ESM.pdf [file 248_2018_1252_MOESM1_ESM.pdf]

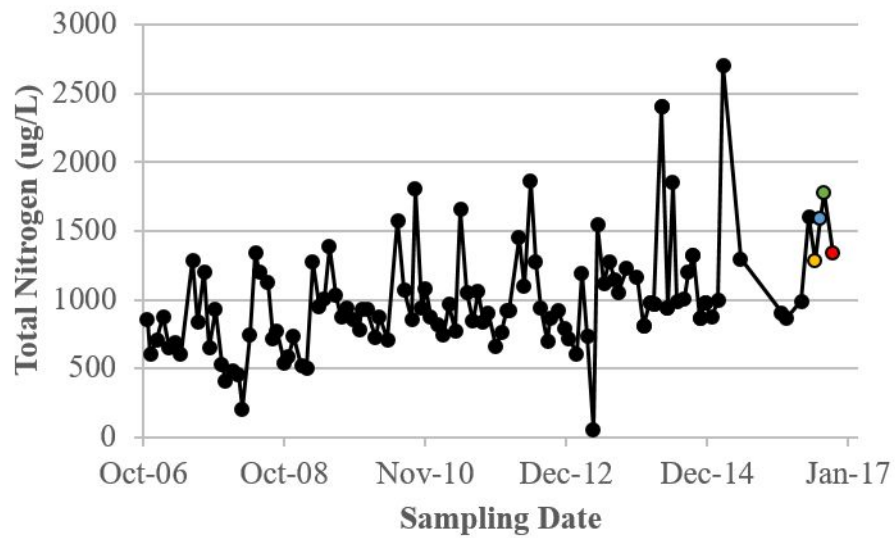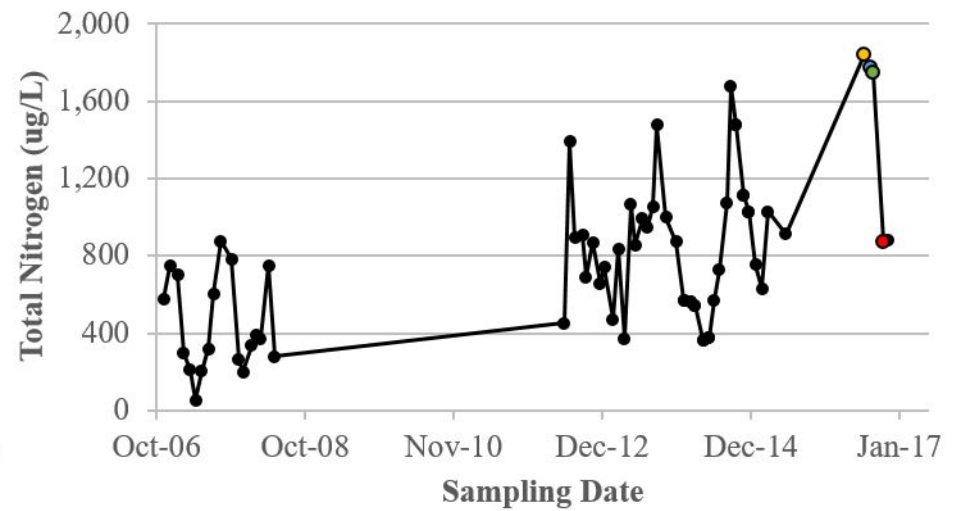

**Online Resource 1**
